# Supplementary material
Source: PubMed Central journal article supplement (PMC6295727)

Human DPP9 represses NLRP1 inflammasome and protects against auto-inflammatory diseases via both peptidase activity and FIIND domain binding

**Franklin L. Zhong**<sup>1,2,3,13\*</sup>, **Kim Robinson**<sup>2,3</sup>, **Daniel Eng Thiam Teo**<sup>1,2,3</sup>, **Kiat-Yi Tan**<sup>1</sup>, **Chrissie Lim**<sup>1</sup>, **Cassandra R. Harapas**<sup>4</sup>, **Chien-Hsiung Yu**<sup>4</sup>, **William Xie**<sup>2</sup>, **Radoslaw M. Sobota**<sup>1</sup>, **Veonice Bijin Au**<sup>1</sup>, **Richard Hopkins**<sup>1</sup>, **Andrea D'Oswaldo**<sup>8</sup>, **John C. Reed**<sup>9</sup>, **John E. Connolly**<sup>1,6,7</sup>, **Seth L. Masters**<sup>4,5</sup>, **Bruno Reversade**<sup>1,2,10,11,12 \*</sup>

1. Institute of Molecular and Cell Biology, A\*STAR, 61 Biopolis Drive, Proteos, Singapore 138673
2. Institute of Medical Biology, A\*STAR, 8A Biomedical Grove, Immunos, Singapore 138648
3. Skin Research Institute of Singapore (SRIS), 8A Biomedical Grove, Immunos, Singapore 138648
4. Inflammation division, The Walter and Eliza Hall Institute of Medical Research, 1G Royal Parade, Parkville, VIC, 3052, Australia.
5. Department of Medical Biology, The University of Melbourne, Parkville, VIC, 3010 Australia
6. Institute of Biomedical Studies, Baylor University, Waco, Texas 76712, USA
7. Department of Microbiology and Immunology, National University of Singapore, 5 Science Drive 2, Singapore 117545
8. Roche Pharma Research and Early Development, Roche Innovation Center Basel, F. Hoffmann-La Roche Ltd, 4070 Basel, Switzerland
9. Sanford-Burnham-Prebys Medical Discovery Institute, La Jolla, California 92037, USA
10. Reproductive Biology Laboratory, Obstetrics and Gynaecology, Academic Medical Center (AMC), Meibergdreef 9, 1105 AZ Amsterdam-Zuidoost, Netherlands
11. Department of Paediatrics, National University of Singapore, 1E Kent Ridge Road, Singapore 119228
12. Medical Genetics Department, Koç University School of Medicine, 34010 Istanbul, Turkey
13. Lee Kong Chian School of Medicine, Nanyang Technological University, 59 Nanyang Dr, Singapore 636921

**Supporting information**  
**Figures S1-S4**  
**Supplemental Excel File 1-2**  
**Supplemental Videos 1-3**

**Figure S1. Supporting evidence for DPP9 as a specific interacting partner of human NLRP1 and inhibitor of human NLRP1 inflammasome**

- A. The most enriched proteins found in the full length NLRP1-FLAG IP eluate measured by quantitative mass spectrometry. The CRAPPome contaminant cut-off was set at maximal spectral count of 5.
- B. 293T cells were treated with pooled siRNAs against *DPP8* and *DPP9* for 3 days. 20 µg of whole cell lysate was used for Western blot.
- C. 293T cells were transfected with FLAG tagged full length NLRP1, a.a. 1213-1474 and a.a. 1213-1373. Whole cell lysate from  $1 \times 10^8$  cells were used for anti-FLAG immunoprecipitation followed by mass spec. 1% of the eluates were analyzed by SDS-PAGE and Western blot.
- D. Domain structure of DPP9.
- E. 293T-NLRP1 cell were transfected with 3xFLAG tagged DPP9L, DPP9S, DPP9L $\Delta$ hydrolase. 0.5 mg of whole cell lysate was used for anti-FLAG IP.
- F. 293T-ASC-GFP cells were transfected with an empty vector, wild-type or NLRP1-M77T mutant. 24 hours after transfection, cell were treated with 3 µM Talabostat or 50 µM sitagliptin. Whole cell lysate was prepared in TBS with 1% NP40 and the insoluble material was crosslinked with 1% DSS in PBS before solubilization in 1x Laemmli's buffer.
- G. Single cell clones of DPP8 knockout and DPP8/9 DKO cells were expanded. 20 µg of whole cell lysate was analyzed by SDS-PAGE and Western blot for endogenous DPP8 and DPP9.
- H. Amino acid sequence of the NLRP1 FIIND auto-cleavage junction. The sequences of the tryptic peptides identified in the mass spec of NLRP1-FLAG IP eluate are shown below.
- I. Thermoshift assay to test Talabostat binding to DPP9 and/or NLRP1. 293T-NLRP1-HA cells were treated with 3 µM Talabostat or DMSO for 24 hours. Whole cell lysates were heated in a temperature gradient from 25 °C to 85 °C in 20 µl aliquots at 1 µg/µl. Denatured proteins were removed by centrifugation at 20,000g for 20 minutes before SDS-PAGE.

**Figure S2. Additional evidence demonstrating that NLRP1 inflammasome activation by DPP8/9 inhibitors involves ASC oligomerization and IL-1 $\beta$  cleavage in human keratinocytes.**

- A. Immortalized keratinocytes were treated with varying doses of Talabostat for 24 hours. Conditioned media were analyzed by IL-1 $\beta$  ELISA.
- B. Conditioned media and cell lysate from A were used to measure the percentage of LDH activity released into the media. Statistical significance was calculated with One-way ANOVA with Bonferroni's Multiple Comparison Test to compare to all treatment groups. Bar graph represents data from biological triplicates.
- C. Overlap between the cytokines induced by Talabostat (3  $\mu$ M) and those enriched in MSPC patient-derived primary keratinocytes.
- D. Quantification of the percentage of cells displaying ASC specks and PI influx. Error bars represent three independent imaging experiments.
- E. Immortalized keratinocytes (N/TERT1) cells were treated with siRNAs against NLRP3, NLRP1, ASC/PYCARD or CASP1 for 48 hours and further treated with 3  $\mu$ M Talabostat or 10  $\mu$ M 1G244 for 24 hours. Cell culture media was harvested and analyzed by ELISA. NLRP3 siRNAs were used as a negative control as N/TERT1 cells do not express NLRP3. P-values were calculated by One-Way ANOVA within each drug treated group, as compared to control treated cells.
- F. Immortalized keratinocytes (N/TERT1) cells were treated siRNAs and Talabostat as in Fig. 2F. The percentage of dead cells was calculated based on Trypan exclusion. We found this to be a much more sensitive measure of cell death than LDH release. P values were calculated with Student's T test from technical triplicates from one of two independent biological experiments.
- G. Immortalized keratinocytes (N/TERT1) cells were treated with siRNAs against NLRP3, NLRP1 or CASP1 for 48 hours and Talabostat for another 24 hours. Culture media was concentrated 10 times before SDS-PAGE.

**Figure S3. Supporting information on the role of the DPP9 NLRP1-binding and enzymatic function.**

- A. SyPRO-Ruby protein staining of the NLRP1-FLAG IP eluates in mock- and 3  $\mu$ M Talabostat treated cells.
- B. 293T ASC-GFP DPP8/9 DKO Clone 1 was co-transfected with NLRP1-HA and DPP9 rescue constructs. Whole cell lysate was harvested 48 hours after transfection and analyzed by SDS-PAGE.

**Figure S4. Additional evidence demonstrating that DPP9 interacts with CARD8 and the effect of DPP9 overexpression in keratinocytes.**

- A. Coomassie staining of anti-FLAG-CARD8 IP eluates in 293T cells expressing FLAG-CARD8. Note that CARD8 undergoes auto-cleavage within the FIIND domain.
- B. Mass spec identification of the DPP9 band in A. The timestamp (2011) demonstrates that these data were obtained independently and without prior knowledge of the data shown in other parts of this manuscript.
- C. Cas9-expressing control, NLRP1 KO and PYCARD/ASC KO immortalized keratinocytes were transfected with vector, wild-type NLRP1 or the P1214R mutant. Cell culture media were harvested 24 hours after transfection and analyzed by IL-1 $\beta$  ELISA. Error bars were calculated by One-Way ANOVA comparing the indicated treatment groups. Bar graph represents one of two independent experiments.
- D. Immortalized keratinocytes were transduced with lentiviral constructs encoding GFP, FLAG-tagged DPP9 and a DPP9  $\Delta$ hydrolase mutant and selected with puromycin. Note that DPP9  $\Delta$ hydrolase does not bind NLRP1 or display enzymatic activity.
- E. Stably transduced immortalized keratinocytes in D were transfected with vector, wild-type NLRP1 or NLRP1 mutants M77T (MSPC) and R726W (AIADK). Cell culture media were harvested 24 hours after transfection and analyzed by IL-1 $\beta$  ELISA. Error bars were calculated by One-Way ANOVA comparing the indicated treatment groups. Bar graph represents one of two independent experiments.

# Figure S1

A

| Protein      | Mascot score   | Fold change (NLRP1/Vector) | CRAPome contaminant |
|--------------|----------------|----------------------------|---------------------|
|              | 1078.0         | 72.2                       | Yes                 |
| ANP32B       | 337.1          | 18.4                       | No                  |
| UBTF         | 403.1          | 13.2                       | Yes                 |
| <b>DPP9</b>  | <b>865.7</b>   | <b>12.7</b>                | <b>No</b>           |
| <b>NLRP1</b> | <b>15007.3</b> | <b>10.6</b>                | <b>No</b>           |
| HADHB        | 619.8          | 10.2                       | Yes                 |
| TXN          | 370.9          | 10.1                       | Yes                 |
| HADHA        | 779.7          | 9.3                        | Yes                 |
| ANP32A       | 273.6          | 7.3                        | Yes                 |
| NCL          | 1538.7         | 6.5                        | Yes                 |

B

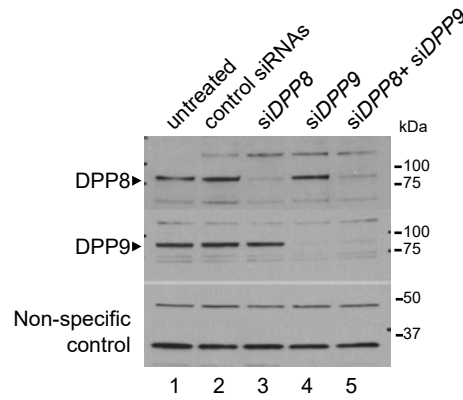

C

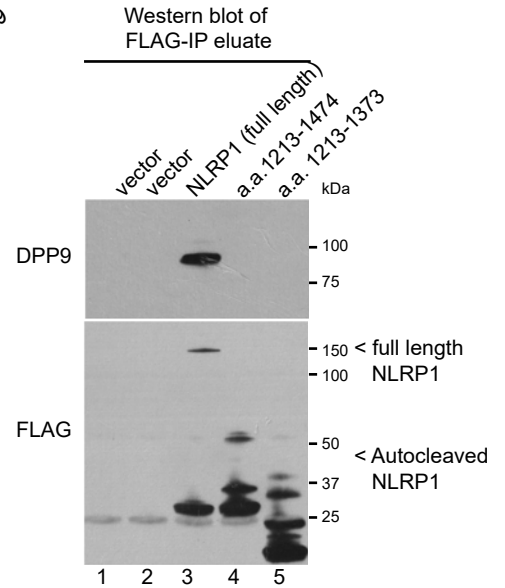

D

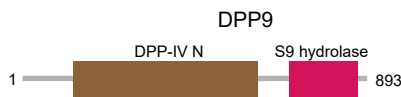

E

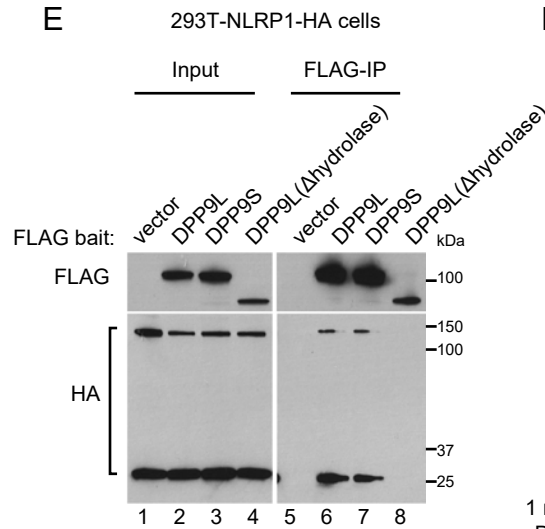

F

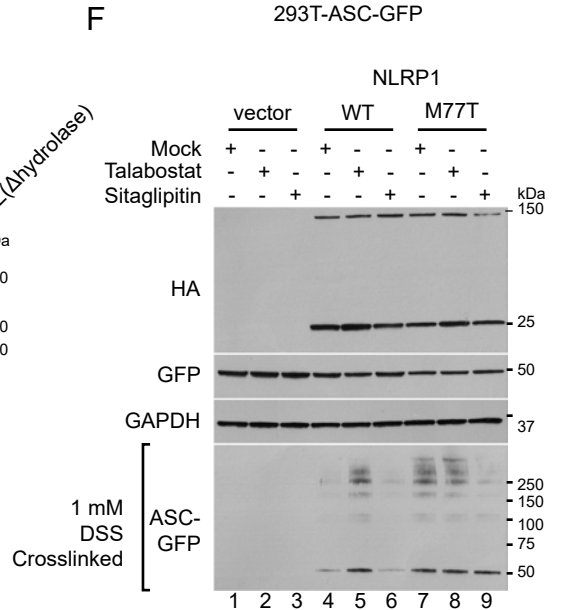

G

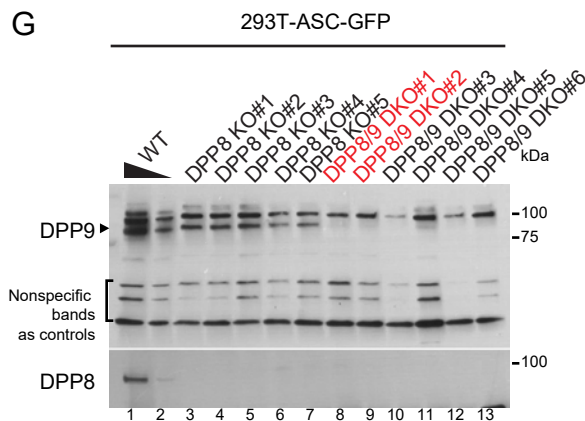

H

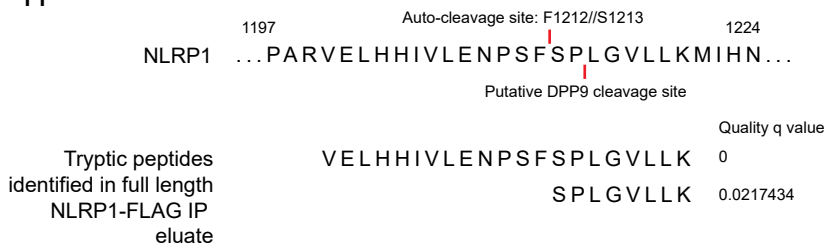

I

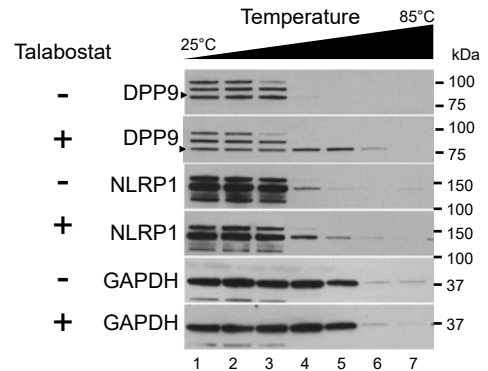

# Figure S2

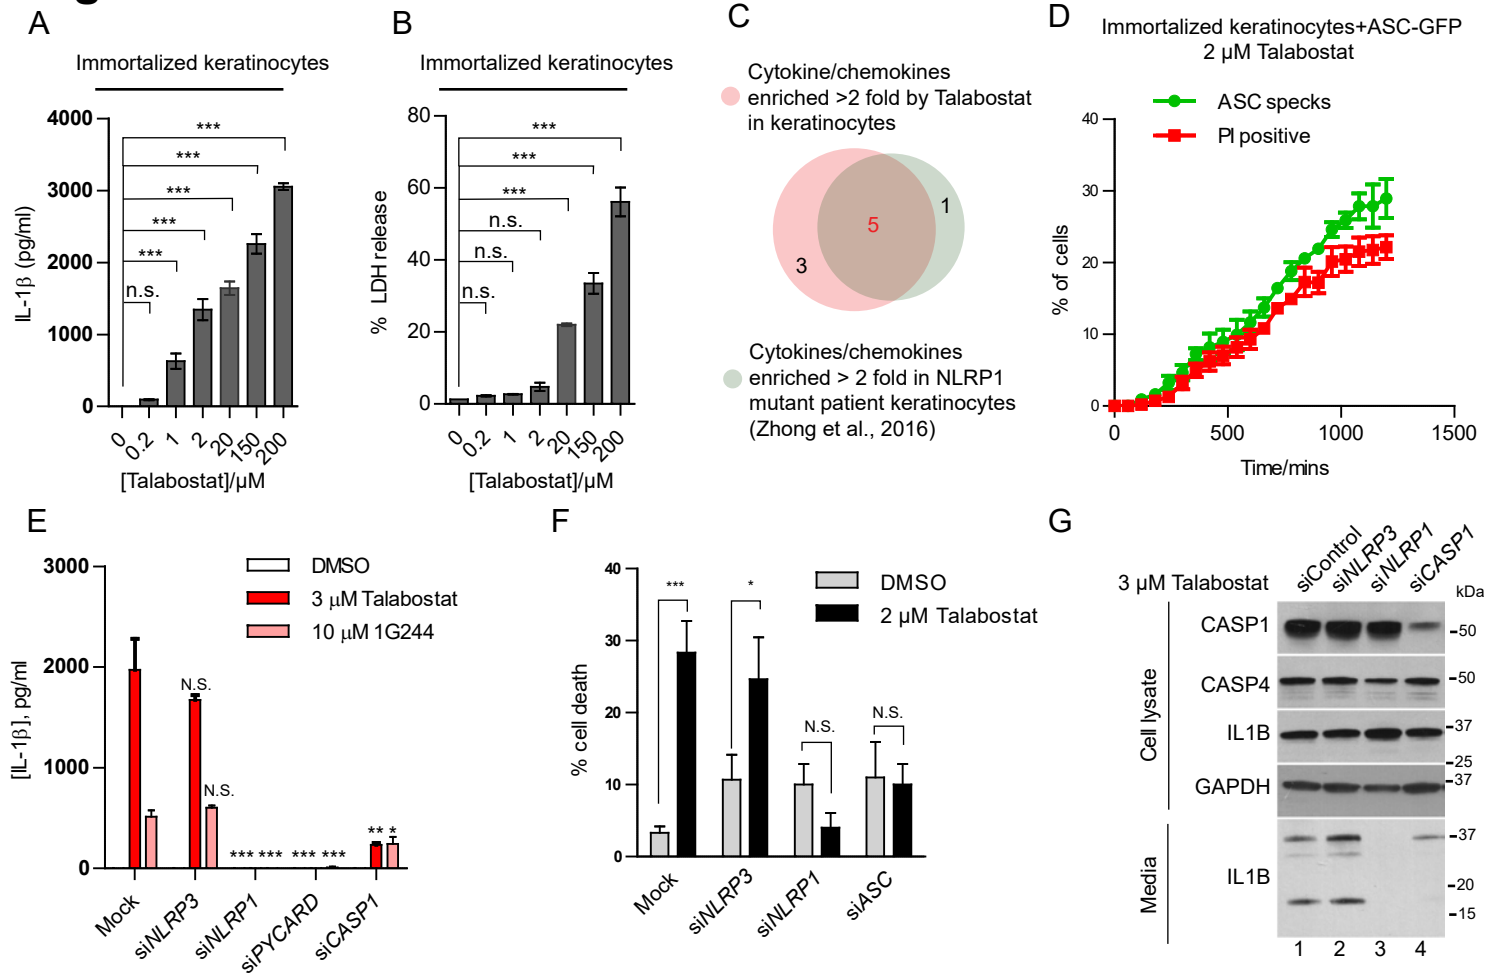

# Figure S3

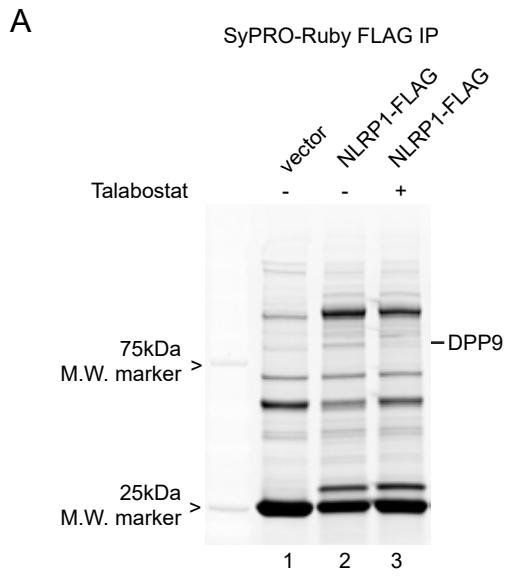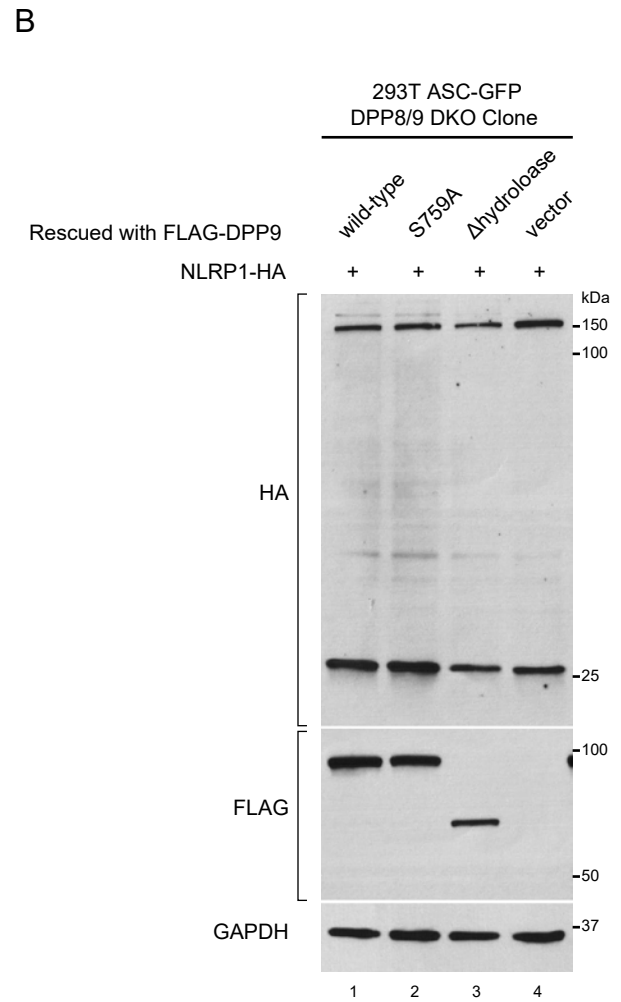

# Figure S4

A

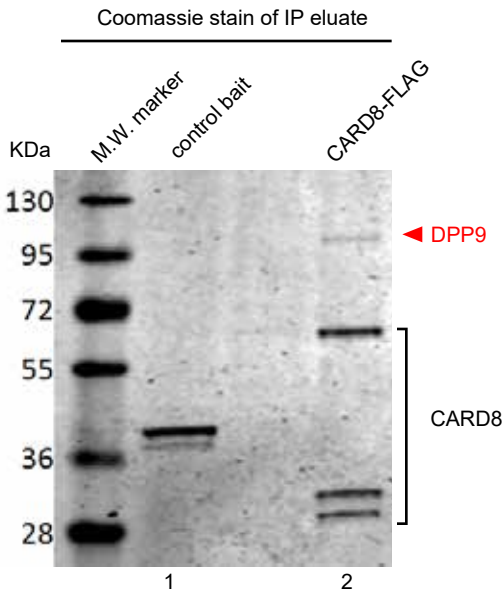

B

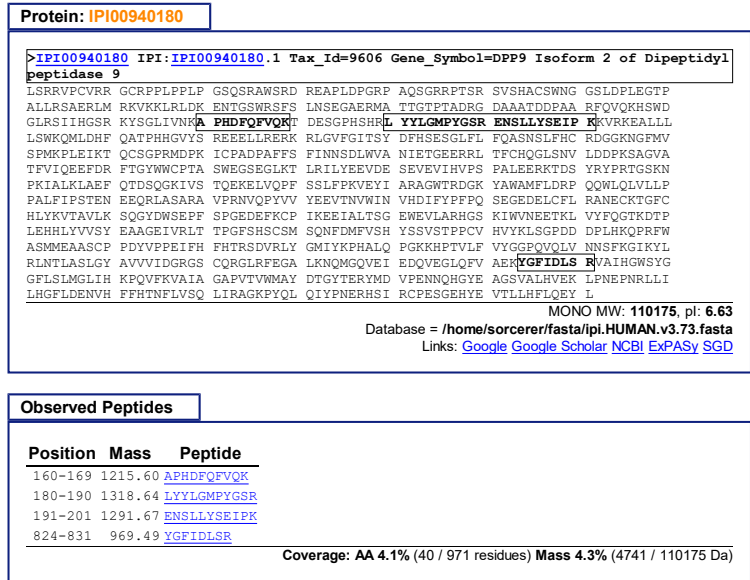

C

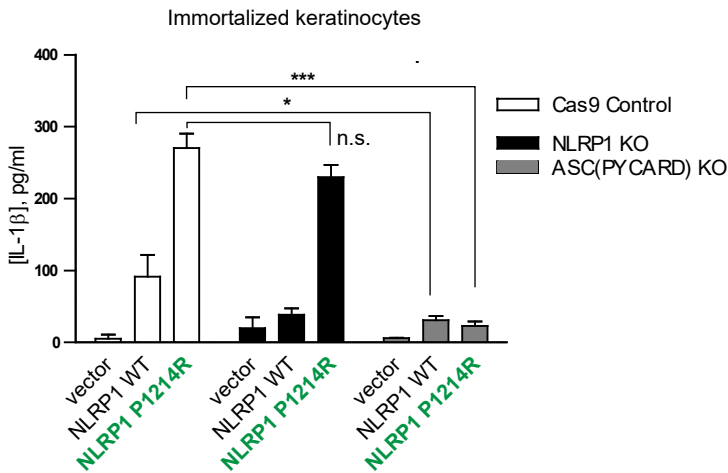

D

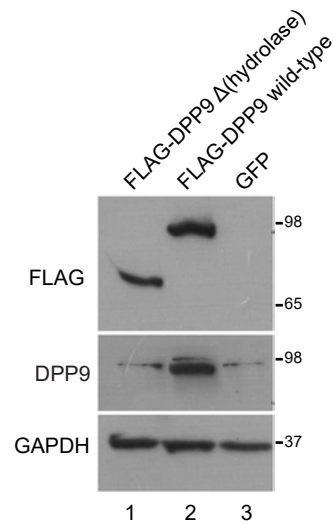

E

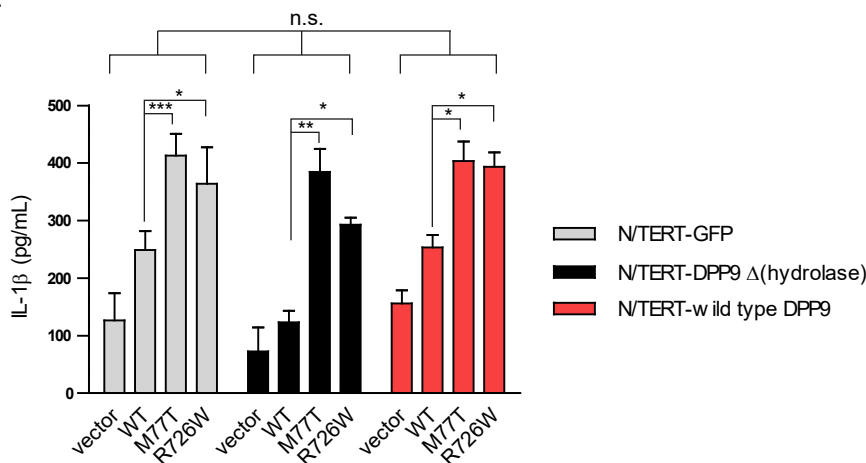

Supplement: supp_RA118.004350_138671_1_supp_209285_pfmtmr.pdf [file supp_RA118.004350_138671_1_supp_209285_pfmtmr.pdf]
